# Supplementary material
Source: PubMed Central journal article supplement (PMC5405277)
Supplement: JCM.00126-17_zjm999095478s1.pdf [file JCM.00126-17_zjm999095478s1.pdf]

$$\text{copy number (molecules}/\mu\text{L)} = \{[\text{concentration (ng}/\mu\text{L)} \times \text{dilution factor} \times \text{RNA template volume } (\mu\text{L)}] \times [6.022 \times 10^{23} \text{ (molecules/mol)}]\} / [\text{length of amplicon} \times 660 \text{ (g/mol)} \times 10^9 \text{ (ng/g)}]$$

**Figure S1** Calculation to determine dsRNA copy number per reaction for the NSP3 gene qRT-PCR assay using the EMD One-Step RT-PCR Master Mix Kit.

**Table S1** Rotavirus A detection results<sup>a,b</sup> and NSP3 gene qRT-PCR assay  $C_T$  values using the ABI GeneAmp EZ *rTth* RNA PCR Kit and EMD One-Step RT-PCR Master Mix Kit, using identical clinical samples (run in duplicate: *nA* & *nB*).

| Sample # | Sample $C_T$ values                    |                                    | Rotavirus A Detection                  |                                    |
|----------|----------------------------------------|------------------------------------|----------------------------------------|------------------------------------|
|          | ABI GeneAmp EZ <i>rTth</i> RNA PCR Kit | EMD One-Step RT-PCR Master Mix Kit | ABI GeneAmp EZ <i>rTth</i> RNA PCR Kit | EMD One-Step RT-PCR Master Mix Kit |
| 1A       | Negative                               | Negative                           | Negative                               | Negative                           |
| 1B       | Negative                               | Negative                           |                                        |                                    |
| 2A       | Negative                               | Negative                           | Negative                               | Negative                           |
| 2B       | Negative                               | Negative                           |                                        |                                    |
| 3A       | Negative                               | Negative                           | Negative                               | Negative                           |
| 3B       | Negative                               | Negative                           |                                        |                                    |
| 4A       | Negative                               | Negative                           | Negative                               | Negative                           |
| 4B       | Negative                               | Negative                           |                                        |                                    |
| 5A       | Negative                               | Negative                           | Negative                               | Negative                           |
| 5B       | Negative                               | Negative                           |                                        |                                    |
| 6A       | Negative                               | Negative                           | Negative                               | Negative                           |
| 6B       | Negative                               | Negative                           |                                        |                                    |
| 7A       | Negative                               | Negative                           | Negative                               | Negative                           |
| 7B       | Negative                               | Negative                           |                                        |                                    |
| 8A       | Negative                               | Negative                           | Negative                               | Negative                           |
| 8B       | Negative                               | Negative                           |                                        |                                    |
| 9A       | 38.388                                 | 35.087                             | Negative                               | Positive                           |
| 9B       | Negative                               | 37.723                             |                                        |                                    |
| 10A      | Negative                               | Negative                           | Negative                               | Negative                           |
| 10B      | Negative                               | Negative                           |                                        |                                    |
| 11A      | Negative                               | Negative                           | Negative                               | Negative                           |
| 11B      | Negative                               | Negative                           |                                        |                                    |
| 12A      | Negative                               | Negative                           | Negative                               | Negative                           |
| 12B      | Negative                               | Negative                           |                                        |                                    |
| 13A      | Negative                               | Negative                           | Negative                               | Negative                           |
| 13B      | Negative                               | Negative                           |                                        |                                    |
| 14A      | Negative                               | Negative                           | Negative                               | Negative                           |
| 14B      | Negative                               | Negative                           |                                        |                                    |
| 15A      | Negative                               | 35.025                             | Negative                               | Positive                           |
| 15B      | Negative                               | 38.419                             |                                        |                                    |
| 16A      | 34.145                                 | 33.444                             | Positive                               | Positive                           |
| 16B      | 36.843                                 | 34.135                             |                                        |                                    |
| 17A      | Negative                               | Negative                           | Negative                               | Negative                           |
| 17B      | Negative                               | Negative                           |                                        |                                    |
| 18A      | Negative                               | Negative                           | Negative                               | Negative                           |
| 18B      | Negative                               | Negative                           |                                        |                                    |

|     |          |          |          |          |
|-----|----------|----------|----------|----------|
| 19A | Negative | Negative | Negative | Negative |
| 19B | Negative | Negative | Negative | Negative |
| 20A | Negative | Negative | Negative | Negative |
| 20B | Negative | Negative | Negative | Negative |
| 21A | Negative | Negative | Negative | Negative |
| 21B | Negative | Negative | Negative | Negative |
| 22A | Negative | Negative | Negative | Negative |
| 22B | Negative | Negative | Negative | Negative |
| 23A | Negative | 35.246   | Negative | Positive |
| 23B | Negative | 37.101   | Negative | Positive |
| 24A | Negative | Negative | Negative | Negative |
| 24B | Negative | Negative | Negative | Negative |
| 25A | Negative | Negative | Negative | Negative |
| 25B | Negative | Negative | Negative | Negative |
| 26A | Negative | Negative | Negative | Negative |
| 26B | Negative | Negative | Negative | Negative |
| 27A | Negative | Negative | Negative | Negative |
| 27B | Negative | Negative | Negative | Negative |
| 28A | 28.426   | 28.208   | Positive | Positive |
| 28B | 28.522   | 28.126   | Positive | Positive |
| 29A | Negative | Negative | Negative | Negative |
| 29B | Negative | Negative | Negative | Negative |
| 30A | Negative | Negative | Negative | Negative |
| 30B | Negative | Negative | Negative | Negative |
| 31A | Negative | Negative | Negative | Negative |
| 31B | Negative | Negative | Negative | Negative |
| 32A | Negative | Negative | Negative | Negative |
| 32B | Negative | Negative | Negative | Negative |
| 33A | Negative | Negative | Negative | Negative |
| 33B | Negative | Negative | Negative | Negative |
| 34A | Negative | 37.699   | Negative | Positive |
| 34B | Negative | 34.426   | Negative | Positive |
| 35A | Negative | Negative | Negative | Negative |
| 35B | Negative | Negative | Negative | Negative |
| 36A | Negative | Negative | Negative | Negative |
| 36B | Negative | Negative | Negative | Negative |
| 37A | Negative | Negative | Negative | Negative |
| 37B | Negative | 39.473   | Negative | Negative |
| 38A | Negative | Negative | Negative | Negative |
| 38B | Negative | Negative | Negative | Negative |
| 39A | Negative | Negative | Negative | Negative |
| 39B | Negative | Negative | Negative | Negative |
| 40A | Negative | Negative | Negative | Negative |
| 40B | Negative | Negative | Negative | Negative |
| 41A | Negative | Negative | Negative | Negative |

|     |          |          |          |          |
|-----|----------|----------|----------|----------|
| 41B | Negative | Negative |          |          |
| 42A | Negative | Negative |          |          |
| 42B | Negative | Negative | Negative | Negative |
| 43A | Negative | Negative |          |          |
| 43B | Negative | Negative | Negative | Negative |
| 44A | Negative | Negative |          |          |
| 44B | Negative | Negative | Negative | Negative |
| 45A | Negative | Negative |          |          |
| 45B | Negative | Negative | Negative | Negative |
| 46A | Negative | Negative |          |          |
| 46B | Negative | Negative | Negative | Negative |
| 47A | Negative | Negative |          |          |
| 47B | Negative | Negative | Negative | Negative |
| 48A | Negative | 38.988   |          |          |
| 48B | Negative | 38.454   | Negative | Positive |
| 49A | Negative | Negative |          |          |
| 49B | Negative | Negative | Negative | Negative |
| 50A | Negative | Negative |          |          |
| 50B | Negative | Negative | Negative | Negative |
| 51A | 28.239   | 28.460   |          |          |
| 51B | 28.319   | 28.266   | Positive | Positive |
| 52A | 37.410   | 32.148   |          |          |
| 52B | Negative | 32.309   | Negative | Positive |
| 53A | Negative | Negative |          |          |
| 53B | Negative | Negative | Negative | Negative |
| 54A | 14.422   | 14.066   |          |          |
| 54B | 14.582   | 14.150   | Positive | Positive |
| 55A | 16.230   | 15.884   |          |          |
| 55B | 16.247   | 15.874   | Positive | Positive |
| 56A | 13.839   | 13.591   |          |          |
| 56B | 13.912   | 13.621   | Positive | Positive |
| 57A | 16.889   | 16.685   |          |          |
| 57B | 16.961   | 16.639   | Positive | Positive |
| 58A | 20.003   | 19.742   |          |          |
| 58B | 20.139   | 19.604   | Positive | Positive |
| 59A | 12.984   | 12.292   |          |          |
| 59B | 13.025   | 12.146   | Positive | Positive |
| 60A | 17.291   | 17.032   |          |          |
| 60B | 17.320   | 17.087   | Positive | Positive |
| 61A | 20.361   | 20.078   |          |          |
| 61B | 20.446   | 20.209   | Positive | Positive |
| 62A | 12.156   | 12.047   |          |          |
| 62B | 12.182   | 12.045   | Positive | Positive |
| 63A | 15.549   | 15.308   |          |          |
| 63B | 15.568   | 15.345   | Positive | Positive |

|     |          |          |          |          |
|-----|----------|----------|----------|----------|
| 64A | 21.738   | 21.583   | Positive | Positive |
| 64B | 21.902   | 21.523   |          |          |
| 65A | 29.284   | 29.914   | Positive | Positive |
| 65B | 30.037   | 29.916   |          |          |
| 66A | 26.749   | 27.005   | Positive | Positive |
| 66B | 26.799   | 26.920   |          |          |
| 67A | 29.011   | 29.320   | Positive | Positive |
| 67B | 29.134   | 28.857   |          |          |
| 68A | 33.297   | 34.140   | Positive | Positive |
| 68B | 33.901   | 34.322   |          |          |
| 69A | 30.513   | 30.849   | Positive | Positive |
| 69B | 30.808   | 30.600   |          |          |
| 70A | 26.538   | 26.494   | Positive | Positive |
| 70B | 26.638   | 26.523   |          |          |
| 71A | 15.006   | 13.464   | Positive | Positive |
| 71B | 15.088   | 13.449   |          |          |
| 72A | 20.786   | 19.077   | Positive | Positive |
| 72B | 21.037   | 19.064   |          |          |
| 73A | 33.424   | 32.392   | Positive | Positive |
| 73B | 34.280   | 32.746   |          |          |
| 74A | 16.496   | 15.123   | Positive | Positive |
| 74B | 16.603   | 15.243   |          |          |
| 75A | 19.607   | 18.163   | Positive | Positive |
| 75B | 19.695   | 18.283   |          |          |
| 76A | 16.460   | 14.801   | Positive | Positive |
| 76B | 16.530   | 14.896   |          |          |
| 77A | 15.918   | 14.293   | Positive | Positive |
| 77B | 16.102   | 14.510   |          |          |
| 78A | 22.045   | 21.085   | Positive | Positive |
| 78B | 22.385   | 21.195   |          |          |
| 79A | 14.455   | 13.232   | Positive | Positive |
| 79B | 14.465   | 13.248   |          |          |
| 80A | 16.169   | 14.748   | Positive | Positive |
| 80B | 16.237   | 14.767   |          |          |
| 81A | 16.143   | 14.700   | Positive | Positive |
| 81B | 16.252   | 14.619   |          |          |
| 82A | 14.295   | 13.010   | Positive | Positive |
| 82B | 14.464   | 12.932   |          |          |
| 83A | 20.182   | 18.738   | Positive | Positive |
| 83B | 20.382   | 18.669   |          |          |
| 84A | Negative | 38.110   | Negative | Positive |
| 84B | Negative | 36.595   |          |          |
| 85A | 19.180   | 17.856   | Positive | Positive |
| 85B | 19.217   | 17.732   |          |          |
| 86A | Negative | Negative | Negative | Negative |

|      |          |          |          |          |
|------|----------|----------|----------|----------|
| 86B  | Negative | 37.266   |          |          |
| 87A  | 13.727   | 12.592   | Positive | Positive |
| 87B  | 13.778   | 12.672   |          |          |
| 88A  | 21.311   | 20.135   | Positive | Positive |
| 88B  | 21.372   | 20.090   |          |          |
| 89A  | Negative | 36.192   | Negative | Negative |
| 89B  | Negative | Negative |          |          |
| 90A  | 13.365   | 12.064   | Positive | Positive |
| 90B  | 13.394   | 12.100   |          |          |
| 91A  | 22.063   | 20.409   | Positive | Positive |
| 91B  | 22.153   | 20.404   |          |          |
| 92A  | Negative | 35.998   | Negative | Negative |
| 92B  | Negative | Negative |          |          |
| 93A  | 32.289   | 32.159   | Positive | Positive |
| 93B  | 35.154   | 32.250   |          |          |
| 94A  | 41.430   | 35.268   | Negative | Positive |
| 94B  | Negative | 36.845   |          |          |
| 95A  | 33.997   | 33.116   | Positive | Positive |
| 95B  | 34.605   | 33.069   |          |          |
| 96A  | 30.162   | 29.827   | Positive | Positive |
| 96B  | 30.660   | 29.579   |          |          |
| 97A  | 34.185   | 33.470   | Positive | Positive |
| 97B  | 42.399   | 33.591   |          |          |
| 98A  | 35.342   | 35.273   | Positive | Positive |
| 98B  | 37.564   | 37.142   |          |          |
| 99A  | 30.845   | 37.115   | Positive | Positive |
| 99B  | 37.071   | 34.767   |          |          |
| 100A | 26.424   | 26.573   | Positive | Positive |
| 100B | 26.666   | 26.168   |          |          |
| 101A | 21.038   | 21.256   | Positive | Positive |
| 101B | 21.169   | 21.129   |          |          |
| 102A | 33.852   | 34.012   | Positive | Positive |
| 102B | 34.607   | 34.128   |          |          |
| 103A | 34.144   | 34.455   | Positive | Positive |
| 103B | 37.466   | 33.965   |          |          |
| 104A | 20.031   | 19.586   | Positive | Positive |
| 104B | 20.043   | 19.844   |          |          |
| 105A | 37.274   | Negative | Negative | Negative |
| 105B | Negative | 39.213   |          |          |
| 106A | 21.049   | 21.047   | Positive | Positive |
| 106B | 21.218   | 21.027   |          |          |
| 107A | 37.166   | 36.051   | Positive | Positive |
| 107B | 41.862   | 36.252   |          |          |
| 108A | 23.072   | 22.853   | Positive | Positive |
| 108B | 23.079   | 23.137   |          |          |

|                          |          |          |          |          |
|--------------------------|----------|----------|----------|----------|
| 109A                     | Negative | Negative | Negative | Negative |
| 109B                     | Negative | 39.490   |          |          |
| 110A                     | Negative | 34.381   | Negative | Positive |
| 110B                     | Negative | 34.885   |          |          |
| 111A                     | Negative | 37.494   | Negative | Positive |
| 111B                     | Negative | 38.028   |          |          |
| NTC 1                    | Negative | Negative | Negative | Negative |
| NTC 2                    | Negative | Negative | Negative | Negative |
| NTC 3                    | Negative | Negative | Negative | Negative |
| NTC 4                    | Negative | Negative | Negative | Negative |
| NTC 5                    | Negative | Negative | Negative | Negative |
| NTC 6                    | Negative | Negative | Negative | Negative |
| NTC 7                    | Negative | Negative | Negative | Negative |
| NTC 8                    | Negative | Negative | Negative | Negative |
| NTC 9                    | Negative | Negative | Negative | Negative |
| NTC 10                   | Negative | Negative | Negative | Negative |
| Negative Control 1A      | Negative | Negative | Negative | Negative |
| Negative Control 1B      | Negative | Negative |          |          |
| Negative Control 2A      | Negative | Negative | Negative | Negative |
| Negative Control 2B      | Negative | Negative |          |          |
| Negative Control 3A      | Negative | Negative | Negative | Negative |
| Negative Control 3B      | Negative | Negative |          |          |
| Negative Control 4A      | Negative | Negative | Negative | Negative |
| Negative Control 4B      | Negative | Negative |          |          |
| Negative Control 5A      | Negative | Negative | Negative | Negative |
| Negative Control 5B      | Negative | Negative |          |          |
| Wa Strain (+) Control 1A | 18.216   | 17.622   | Positive | Positive |
| Wa Strain (+) Control 1B | 18.292   | 17.285   |          |          |
| Wa Strain (+) Control 2A | 18.296   | 18.166   | Positive | Positive |
| Wa Strain (+) Control 2B | 18.471   | 18.627   |          |          |

|                             |        |        |          |          |
|-----------------------------|--------|--------|----------|----------|
| Wa Strain (+)<br>Control 3A | 17.370 | 17.162 | Positive | Positive |
| Wa Strain (+)<br>Control 3B | 17.389 | 17.407 |          |          |
| Wa Strain (+)<br>Control 4A | 17.603 | 17.618 | Positive | Positive |
| Wa Strain (+)<br>Control 4B | 17.894 | 17.684 |          |          |
| Wa Strain (+)<br>Control 5A | 18.017 | 17.392 | Positive | Positive |
| Wa Strain (+)<br>Control 5B | 18.066 | 17.421 |          |          |

<sup>a</sup> Samples determined to be positive for Rotavirus A only if both replicates showed NSP3 amplification with a calculated  $C_T$  value.

<sup>b</sup> Comparison of  $C_T$  values between ABI and EMD kits [t-Test (paired)] used the average  $C_T$  value per sample. The EMD kit showed significantly lower  $C_T$  values,  $p < 0.0001$ .



**Table S2** Rotavirus A detection results<sup>a</sup> and measures of agreement for the NSP3 gene qRT-PCR assay when comparing the EMD One-Step RT-PCR Master Mix Kit to the ABI GeneAmp EZ *rTth* RNA PCR Kit, using identical clinical samples.

|                                                            |          | ABI GeneAmp EZ <i>rTth</i> RNA PCR Kit<br>(non-reference standard) |          | Total |
|------------------------------------------------------------|----------|--------------------------------------------------------------------|----------|-------|
|                                                            |          | Positive                                                           | Negative |       |
| EMD One-Step RT-PCR Master Mix Kit<br>(new test)           | Positive | $a = 52$                                                           | $b = 10$ | 62    |
|                                                            | Negative | $c = 0$                                                            | $d = 49$ | 49    |
| Total                                                      |          | 52                                                                 | 59       |       |
| Positive Percent Agreement = $100 \times [a/(a+c)]$        |          | 100.00% (95% CI 93.12% - 100.00%)                                  |          |       |
| Negative Percent Agreement = $100 \times [d/(b+d)]$        |          | 83.05% (95% CI 71.54% - 90.52%)                                    |          |       |
| Overall Percent Agreement = $100 \times [(a+d)/(a+b+c+d)]$ |          | 90.99% (95% CI 80.49% - 98.75%)                                    |          |       |

<sup>a</sup> Samples determined to be positive for Rotavirus A only if both replicates showed NSP3 amplification along with a calculated  $C_T$  value.
